1 **Rapid and dynamic nucleic acid hybridization enables enzymatic oligonucleotide synthesis by cyclic**  
2 **reversible termination**

3 **or**

4 **A novel mechanism for enzymatic DNA synthesis**

5 K. Hoff<sup>1\*</sup>, M. Halpain<sup>1</sup>, G. Garbagnati<sup>1</sup>, J. Edwards<sup>1,2,3,4,5</sup>, W. Zhou<sup>1</sup>

6  
7 **Affiliations:**

8 <sup>1</sup>Department of Advanced Research and Development, Centrillion Biosciences, 2500 Faber Place, Palo Alto, CA  
9 94303, USA.

10 <sup>2</sup>Chemistry and Chemical Biology, University of New Mexico, Albuquerque, NM 87131, USA.

11 <sup>3</sup>Internal Medicine, Chemical and Biological Engineering, University of New Mexico, Albuquerque, NM 87131,  
12 USA.

13 <sup>4</sup>University of New Mexico Comprehensive Cancer Center, Albuquerque, NM 87131, USA.

14 <sup>5</sup>University of New Mexico Health Sciences Center, Albuquerque, NM 87131, USA.

15 \*Correspondence to: [KHoff@Centrilliontech.com](mailto:KHoff@Centrilliontech.com)

16 **Abstract:**

17 Phosphoramidite chemistry for DNA synthesis remains the industry standard despite limitations on length and yield  
18 of the resulting oligonucleotides, time restrictions, and the production of hazardous waste. Herein, we demonstrate  
19 the synthesis of single-stranded oligos on a solid surface by DNA polymerases and reverse transcriptases. We report  
20 single base extension of the surface-bound oligonucleotide which transiently hybridizes to a neighboring strand with  
21 as few as the last two bases. Additionally, when multiple transient hybridization structures are possible, each  
22 templating a different base, a DNA polymerase or reverse transcriptase can extend the oligonucleotide with either of  
23 these two bases, and therefore the sequence of the newly synthesized fragment can be controlled by adding only the  
24 desired base (dNTP deoxyribonucleic acid triphosphate) to create custom oligonucleotides. We used this enzymatic  
25 approach to synthesize a 20 base oligonucleotide by incorporating reversible terminator dNTPs through a two-step  
26 cyclic reversible termination process with stepwise efficiency over 98%. In our approach, a nascent DNA strand that  
27 serves as both primer and template is extended through polymerase-controlled sequential addition of 3'-reversibly  
28 blocked nucleotides followed by subsequent cleavage of the 3'-capping group. This process enables oligonucleotide  
29 synthesis in an environment not permitted by traditional phosphoramidite methods, eliminates the need for  
30 hazardous chemicals, has the potential to provide faster and higher yield results, and synthesizes DNA on a solid  
31 support with a free 3' end.

32

33 **Introduction:**

34 The first chemically synthesized dinucleotide, dTdT, was reported in 1955(1), and the first gene was synthesized in  
35 1970(2). This gene, encoding a transfer RNA, was just 77 bases long and synthesized by enzymatically joining 17  
36 chemically synthesized short oligonucleotides (2). While today, anyone can purchase custom oligonucleotide  
37 sequences up to several thousand bases long, the demand for longer and more accurate synthetic DNA is increasing  
38 as DNA and RNA are used for new applications in therapeutics (3,4), high-throughput genotyping (5), gene and  
39 whole genome synthesis(6), and data storage (7). These new applications place high requirements on stepwise  
40 yields, but chemical synthesis methods can only achieve 98.5-99.5% stepwise efficiency. For example, the final  
41 yield for a 1kb fragment synthesized with 99.5% efficiency per step is less than 1%. Therefore, long sequences are  
42 enzymatically assembled from shorter, purified, chemically synthesized fragments, and they are then enzymatically  
43 processed and screened to remove inaccurate sequences or to correct for errors. This process can be arduous and the

44 ability to synthesize longer, more accurate sequences would enable emerging advanced technologies limited by this  
45 multi-step method(6).

46

47 The first published Enzymatic Oligonucleotide Synthesis (EOS) methods used RNases (8) and polynucleotidyl  
48 phosphorylase(9). Oligonucleotides synthesized with these enzymes enabled research that was otherwise impossible  
49 at the time(10), but the methods were highly inefficient compared with emerging phosphoramidite chemistry and  
50 subsequently abandoned. Attempts at EOS have also been made with ligases(11), but all recent published efforts  
51 have utilized Terminal deoxynucleotidyl Transferase (TdT). TdT is a unique DNA polymerase that can extend  
52 single-stranded DNA but not a DNA duplex due to a 16 amino acid lariat-like loop that occupies the binding site for  
53 a templating DNA strand(12). Several enzymatic oligonucleotide synthesis approaches using TdT have been  
54 attempted; cyclic reversible termination with 3'-blocked nucleotides(13–15), using a reversible covalent TdT-  
55 nucleotide complex (16), or simply using dNTPs to synthesize homopolymer tracts for data encryption(17,18). For  
56 various reasons, these methods have experienced limited success, and the longest product accurately synthesized  
57 using TdT is just 10 bases. However, as the demand for longer, more accurate, less expensive oligonucleotides  
58 increases, polymerase-mediated methods are a natural direction to explore, because *in vivo*, these enzymes are  
59 capable of high-fidelity synthesis of an entire genome(19). Therefore, we sought to develop a cyclic reversible  
60 termination method using a polymerase that efficiently incorporates 3'-blocked reversible terminators, and herein  
61 we demonstrate controlled synthesis of single-stranded 20mer DNA oligonucleotide with stepwise efficiency over  
62 98%. Ultimately, we envision a path forward using our methods to achieve efficiencies that exceed traditional  
63 phosphoramidite methods.

64

## 65 **Results:**

### 66 **Transient Secondary Structures in DNA Enable Synthesis.**

67 Herein, we demonstrate the unique ability of some DNA polymerases and reverse transcriptases (RTs) to extend  
68 single-stranded DNA, as shown in Fig. 1a. Since the enzymes tested lack terminal deoxynucleotidyl transferase  
69 activity, we hypothesized that the polymerase extends the oligonucleotide when it forms a transient hybridized  
70 structure though the sequence of the oligonucleotide used can only hybridize two bases at the 3' end. We sought to  
71 harness this capability for EOS, and we generated a series of modified 9°N DNA polymerases capable of efficiently

72 incorporating reversible terminators in these reactions, which we refer to as Duplases. The oligonucleotide extension  
73 products are templated single base extensions that are the result of transient hybridization, and Duplase extension  
74 proceeds in a sequence-specific manner with only two bases of transient hybridization which may be occur  
75 internally or opposite a neighboring strand (Fig. 1b-c). Although extension with a nucleotide not templated by a  
76 neighboring sequence can be observed at longer timepoints, we hypothesize that this is the result of  
77 misincorporation, and for shorter one-minute reactions, complete incorporation with either of two the templated base  
78 is observed, and no incorporation is observed with the other two non-templated bases (Fig. 1b).

79

80 **Fig. 1. Dynamic hybridization of DNA enables EOS. (a) Extension of single-stranded DNA by DNA**

81 **polymerases and reverse transcriptases.** Denaturing PAGE analysis of a 20 base single-stranded sequence, self-  
82 priming oligo-1 aka SPO-1, using different enzymes and dGTP. Despite a maximum of two bases of hybridization,  
83 some enzymes are able to extend this solid-phase oligonucleotide. None of these enzymes have previously been  
84 reported to have nucleotidyl transferase activity on single-stranded DNA. **(b) Sequence-specific extension of**

85 **single-stranded DNA.** Duplase extension of four different 20 base oligos proceeds in a sequence-specific manner,  
86 and only two bases of hybridization are required for extension. \* indicates unextended control. Extension with non-

87 templated bases can be explained by misincorporation that occurs at long reaction times. **(c) Extension of solid-**

88 **phase oligos through intermolecular reactions.** Magnetic beads were conjugated with either a 20 base poly-T  
89 oligonucleotide as illustrated in *i*, or with that oligonucleotide plus a 30 base poly-T oligonucleotide with an internal  
90 5'-CAA-3' sequence as illustrated in *ii*. Beads were extended using Duplase-3 and Cy5-ddGTP (\* indicates  
91 unextended control during this step), after which, all samples were labeled with TdT and fluorescein-12-ddUTP.  
92 Oligos appear blue if extended with Duplase-3 and green if extended with TdT.

93

94 The ability of the Duplase to extend the single stranded oligonucleotides supports a dynamic transient hybridization  
95 model as illustrated in Fig. 1b, and intermolecular interactions alone are sufficient to facilitate extension of surface-  
96 bound oligos (Fig. 1c). To support this assertion, we have shown that oligo-dT sequences are not efficiently  
97 extended by the Duplase, because the oligo-dT is unable to hybridize intramolecularly. However, robust extension  
98 of an oligo-dT sequence is achieved when a second templating oligo is bound to the same surface (Fig. 1C).

99

100 **Polymerase-catalyzed cyclic reversible termination.**

101 Some DNA polymerases are able to catalyze the incorporation of a reversible terminator on a solid phase  
102 oligonucleotide. The templating strand may be the nascent strand itself through hairpin formation and cis-extension,  
103 a neighboring strand, or another oligo provided in solution (Fig. 2). Oligos cannot be extended beyond a single base  
104 addition due to the 3' blocking group (3'-OR) on the newly added nucleotide. After the single base incorporation  
105 event, the 3'-hydroxyl is restored through a cleavage reaction. This process may be repeated for the addition of a  
106 second, third, etc. base. Chemically-cleavable reversible terminators, 3'-O-azidomethyl-dNTPs, were used, and  
107 deprotection was achieved using Tris (2-carboxyethyl) phosphine hydrochloride (TCEP), as first described by Palla  
108 *et al.* (20). However, we suspect that other reversible terminators could be used, such as chemically cleavable 3'-  
109 aminoxy groups (21), enzymatically cleavable(22), or UV-cleavable(23,24) reversible terminator nucleotides.

110

111 **Fig. 2. (a) Polymerase-mediated solid-phase oligonucleotide synthesis using chemically blocked substrates.**

112 DNA/RNA polymerases and RTs require a template for extension. (i) The templating strand for a surface-bound  
113 oligonucleotide may be a neighboring strand, an oligo in solution, or the nascent strand itself. A 3'-reversibly  
114 blocked nucleotide is added by the enzyme in solution to produce the oligo depicted in (ii), one base longer, but not  
115 capable of being extended. The 3'-OR group is then converted into a 3'-OH group through a cleavage step  
116 producing the oligo in (iii), which can be extended again. **(b) Sequential incorporation of two bases.** Denaturing  
117 PAGE analysis of a 20 base template, SPO-1, after incorporation of 3'-O-azidomethyl-dTTP (+1 base), followed by  
118 cleavage of the 3'-O-azidomethyl capping group and incorporation of 3'-O-azidomethyl-dCTP (+ 2 bases). \*

119 indicates unextended control. **(c) Synthesis of a 20 base single-stranded DNA fragment on a universal**  
120 **templating oligo.** A 20 base sequence, ESO-1, was synthesized using this method on a universal templating oligo  
121 (UTO-1) using Duplase-3. Denaturing PAGE was performed after the addition of 4, 8, 12, 16, and 20 bases.

122

123 **The enzymes.**

124 Extension reactions using reversible terminators require enzymes with catalytic domains that are sufficiently large to  
125 accommodate the 3'-capping group. Many such enzymes have been reported, and numerous modified DNA  
126 polymerases have been developed for this purpose(25,26). Of the enzymes tested, the Moloney murine leukemia  
127 virus (M-MLV) RT, Superscript III, and the 9<sup>n</sup>N DNA polymerase, Therminator, are capable of extending solid-

128 phase single stranded DNA with as few as two bases available for transient hybridization (Fig. 1a). Because the 9°N  
129 DNA polymerase has historically been the polymerase of choice for sequencing-by-synthesis experiments using 3'-  
130 O-azidomethyl reversible terminators(27,28), we generated a series of modified 9°N DNA polymerases variants to  
131 develop an optimized enzyme for EOS. We refer to our enzyme as a Duplase (available from Centrillion  
132 Biosciences).

133  
134 Comparative analysis of the fidelity of three Duplase enzymes is shown in Fig. 3. Traditional primer extension  
135 reactions show that Duplase-1 is higher fidelity than Duplase-2, which is higher fidelity than Duplase-3 (Fig. 3a).  
136 Decreasing enzyme fidelity increases the probability of misincorporation events, thus increasing the chance that a  
137 base may be added to a surface-bound oligo when the oligo may exist in a conformation that does not necessarily  
138 template the base in solution since only one reversible terminator base is provided during each step of EOS (Fig.3b).  
139 This concept is illustrated in Fig. 3c, where a single oligonucleotide may rapidly switch between different transient  
140 hybridization states templating different bases. A high-fidelity polymerase will only incorporate A in one of the four  
141 structures drawn, whereas a low-fidelity polymerase might incorporate A opposite C or G or A as well. Therefore,  
142 the more promiscuous the enzyme, the higher the yield of the reaction product in the same amount of time.  
143 However, extension with a non-templated base (Fig. 3d) requires more time than extension with a templated base. In  
144 one minute, extension appears to be complete using the templated base, G, but no extension is observed using the  
145 non-templated base, A. If the reaction is allowed to proceed for one hour, however, extension can be observed using  
146 A. Since Duplase-3 has the lowest fidelity, we reason it will have the highest yield for EOS, and therefore it is used  
147 for the synthesis of the 20 base single-stranded oligonucleotide. Furthermore, Duplases are able to use  
148 ribonucleotides as a substrate (Supp. Fig. 1), and the 9°N polymerase has been used for XNA synthesis(29,30),  
149 increasing the options for substrates that can be synthesized using this technique.

150  
151 **Fig.3. Effects of misincorporation on step-wise yield. (a) Duplase fidelity on a double-stranded substrate.**  
152 Primer extension reactions were conducted using the two oligos sequences shown with the longer templating strand  
153 bound to streptavidin-coated magnetic beads through a 5' biotin modification. The primer was stripped from the  
154 surface-bound template and analyzed by denaturing PAGE. Extension opposite adenine is shown with dATP, dTTP,  
155 dCTP, or dGTP used as the substrate in the reaction for (i) Duplase-1, (ii) Duplase-2, and (iii) Duplase-3. Increasing

156 misincorporation can be seen. \* indicates unextended primer control. **(b) Extension of a single-stranded substrate.**

157 Reactions were conducted using a surface-bound single-stranded oligo, SPO-1, as shown with one of four 3'-O-

158 azidomethyl-dNTP in solution and (i) Duplase-1, (ii) Duplase-2, and (iii) Duplase-3. \* indicates unextended primer

159 control. As polymerase fidelity decreases, the capability to incorporate bases not templated by a neighboring strand

160 or hairpin structure increases. **(c) Illustration of transient hybridization.** An example oligonucleotide is shown

161 templating four different bases for four different hybridization positions. Such an oligonucleotide at any point in

162 time may exist in one of these conformations but not all of these conformations. **(d) Misincorporation reactions**

163 **may be slower than templated reactions.** Extension of the single-stranded substrate in **(b)**, SPO-1, is demonstrated

164 in one minute or one hour with Duplase-3 and 3'-O-azidomethyl-dATP (not templated by this oligonucleotide) or

165 3'-O-azidomethyl-dGTP (templated). In one minute, extension appears to be complete using the templated base, G,

166 but no extension is observed using the non-templated base, A. If the reaction is allowed to proceed for one hour,

167 however, extension can be observed using A.

168

169 **Optimization of reaction conditions.**

170 For EOS application, we want the enzyme to incorporate the provided base, regardless transient hybridization

171 structures. Therefore, we assayed variables to increase the chance of any incorporation (which includes

172 misincorporation) and found that reaction temperature and the divalent metal ion used had the most significant

173 impact. Manganese has been shown to alter the geometry of the polymerase's substrate binding pocket, opening it

174 up to allow for polymerization with a non-templated base(31), and polymerases are temperature sensitive with

175 respect to fidelity(32). Optimal extension of single-stranded oligos was achieved using manganese (Supp. Fig. 2) at

176 60°C (Supp. Fig. 3). Because the lifetime of hybridization structures decreases with increasing temperatures, these

177 data support a model of transient DNA hybridization where oligonucleotides on a solid surface are rapidly flipping

178 between hybridization states that may be recognized and extended by a DNA polymerase or RT.

179

180 **Extension opposite templates in solution.**

181 Random hexamer priming is a well-established method for cDNA synthesis, rolling circle amplification, and

182 multiple displacement amplification for whole genome amplification(33,34). We sought to enhance extension of a

183 surface-bound oligo by the addition of in-solution 3'-blocked oligonucleotides to serve as intermolecular

184 hybridization partners for templated polymerase extension. It was determined that randomers increase incorporation  
185 in reactions with Duplase-3 and a short solid-phase primer (Fig. 4a). As with single-stranded oligos, reactions with  
186 random templates in solution are most efficient at higher temperatures, plateauing around 60°C (Supp. Fig. 3).  
187 Reaction yields are also higher with shorter randomers in solution (Supp. Fig. 4).

188  
189 When the templating strand is in solution, Duplases require three bases for hybridization and at least one base  
190 overhang for efficient extension of a solid-phase primer (Fig. 4b-c). Increased base pairing requirements may result  
191 from instability that is not present when the template is a neighboring oligonucleotide tethered to the same solid  
192 surface. Non-random templates of known sequence are predictably more effective in increasing reaction yields than  
193 random templates are (Fig. 4d-e). There are, however, 1024 possible different sequences for a pentamer, the shortest  
194 oligonucleotide commercially available ( $4^5$ ). In order to develop a protocol for the synthesis of any possible  
195 sequence, all 1024 different pentamer sequences would have to be stocked and stored in separate wells in an  
196 automatic synthesizer, which is not feasible. Only one solution would be required for a random pentamer, NNNNN  
197 (N denotes a random base, A, T, C, or G). Four solutions would be required for a semi-random sequence, XNNNN,  
198 where X templates the incoming base, and 16 solutions would be required for the semi-random sequence, XYNNN,  
199 where Y is complementary to the last base of the solid-phase oligo. These two semi-random oligos improve  
200 synthesis yields over random pentamers when added to reaction solutions (Fig. 4d-e). However, there are obvious  
201 drawbacks to this method, for example when X=Y or for repetitive or homopolymeric stretches, and removal of  
202 templates from solution may be incomplete without additional purification steps and the use of templating oligos  
203 adds to the cost of the reactions. Instead, a universal templating oligo was used for the EOS of 20 bases as described  
204 below.

205  
206 **Fig. 4. (a) Extension of a short solid-phase oligo is enhanced by the addition of randomers to the reaction**  
207 **solution.** Denaturing PAGE analysis of a 20 base oligo extended with Duplase-3 and 3'-O-azidomethyl-dNTPs  
208 without added template to solution (-T) or with the addition of 3'-phosphate blocked random hexamers to the  
209 reaction solution (+T). \* indicates unreacted control. **(b) Possible hybridization of different templates to a solid-**  
210 **phase poly-T sequence.** Templates used in (c) are drawn in blue. **(c) Three bases of hybridization are required**  
211 **with a template in solution.** Denaturing PAGE analysis of a poly-T sequence extended with Duplase-3 and Cy5-



212 ddGTP. 3'-phosphate blocked hexamers are used in reaction solutions with the sequences listed. \* indicates  
213 unreacted control. -T indicates reactions without added template. After extension with Duplase-3, all samples were  
214 incubated with TdT and fluorescein-12-ddUTP to label any primer that was not extended with Duplase-3. **(d)**  
215 **Possible hybridization of different templates to a solid-phase oligo.** Templates used in (e) are drawn in blue.  
216 Some potential sequence alignments during transient hybridization reactions are illustrated. **(e) Extension of a solid-**  
217 **phase oligo with specific, random, and semi-random templates in solution.** Denaturing PAGE analysis of SPO-1  
218 after extension with Duplase-3 and 3'-O-azidomethyl-dATP. 3'-phosphate blocked pentamers are used in reaction  
219 solutions with the sequences listed. \* indicates unreacted control. -T indicates reactions without added template.

220

### 221 **Design of a universal template.**

222 A universal templating oligonucleotide (UTO) is an oligonucleotide sequence that can template any base regardless  
223 of the 3' sequence. UTOs were originally designed including the universal base, 5-nitro-1-indolyl-3'-deoxyribose  
224 (5-NI)(35-37), however, there is no universal base that meets all desired requirements for EOS, ability to pair with  
225 all natural bases equally, prime DNA synthesis by DNA polymerases, and direct incorporation off each of the  
226 natural nucleotides(35,38). Therefore, we designed UTO-1, a 78 base sequence (Supp. Table 1), that contains all  
227 codons and includes poly-T sequences at the 3' and 5' ends that serve as spacers and a 3' deoxyuracil. The 3'  
228 deoxyuracil can be enzymatically cleaved using a combination of Uracil-DNA Glycosylase and apurinic/aprimidic  
229 endonuclease to isolate the enzymatically synthesized fragment(39). All ANN, TNN, CNN, and GNN sequences are  
230 contained within UTO-1, meaning that any base can be templated during transient hybridization for efficient EOS.  
231 Using this approach, we synthesized the 20 base sequence ESO-1 (enzymatically synthesized oligo-1) on UTO-1  
232 using Duplase-3. The resulting oligo was poly-adenylated, and adapters were added by PCR (Supp. Fig. 5), and the  
233 library was sequenced on a MiSeq sequencer (Illumina, San Diego, CA).

234

### 235 **Accuracy of the synthesized oligonucleotide.**

236 Background<sup>8</sup> The sequencing data on the MiSeq was analyzed and 83,631 sequences of our synthesized  
237 oligonucleotide were obtained. These sequences were randomly divided into 10 groups for a statistical bootstrapped  
238 analysis of the incorporation efficiency and multiple base incorporation frequency (Fig. 5). The number of reads  
239 containing the full length ESO-1 sequence was compared to the number of reads one base shorter to determine the

240 efficiency for the perfect incorporation of the final base, and these calculations were repeated to determine synthesis  
241 efficiency at each enzymatic synthesis step. Calculations excluded regions containing a homopolymer run because  
242 when the n-1 base was the same as the n base or the n+1 base, and therefore failure to synthesize either base would  
243 result in the same partial sequence. We observed that XX% of the sequences erroneously contained repeated bases.  
244 For example, some of the sequences containing N<sub>13</sub>CAG read as N<sub>13</sub>CAGG or N<sub>13</sub>CAGGG. Incorporation of the  
245 final base, C, in N<sub>13</sub>CAGC was thus calculated from the number of reads containing N<sub>13</sub>CAG less the number of  
246 reads containing N<sub>13</sub>CAGG. These incorrect sequences could be caused by either 3'OH contaminating bases in the  
247 extension mix (17) or TCEP carry over during the synthesis. .

248  
249 Based on the sequencing data, we calculated the stepwise efficiency for the last 12 bases of ESO-1 from the subset  
250 of sequences that correctly contained the first 8 bases. While the mean success efficiency for ESO-1 was 87.9%,  
251 after correcting for multiple base additions, the mean success efficiency was 98.4%. For the control sequence, the  
252 mean success efficiency was 97.1%, and incorporation efficiency was 97.8% (Fig. 5).

253  
254 **Fig. 5. Oligo Synthesis Efficiency. (a) Variables for evaluating efficiency.** The success rate, multiple base  
255 incorporation rate, and adjusted incorporation rate are calculated for the extension of the oligo NNNNNA with D.  
256 These numbers are calculated for the bootstrapped sequences for ESO-1 **(b)**, and for the partial UTO-1 sequence  
257 used as a control **(c)**. \* indicates oligos for which the n+2 base is the same so that the sequence NNNNNAA as in  
258 the example in part (a) may be due to multi-base extension or C not being incorporated. + indicates oligos for which  
259 the n+1 base is the same so that multi-base extension cannot be distinguished from accurate synthesis. These  
260 numbers were omitted from analysis.

261  
262 A secondary method of analyzing the stepwise incorporation efficiency was also implemented. The sequence  
263 alignment of the correct sequence and each MiSeq read was evaluated, as illustrated in Fig. 6 Each correctly aligned  
264 base was scored with a value of 1, and mismatches, insertions, and deletions were scored with 0. This allowed us to  
265 evaluate the accuracy of our final fragment, accounting for multiple addition events. The results indicated that  
266 54.6% of ESO-1 reads achieved the maximum score of 19 (the first base of the 20 base sequence was omitted  
267 because it is the same as the last base on UTO-1), and 95.2% of the control sequence, UTO-1p2, reads achieved the

268 maximum score of 14. This results in a step-wise efficiency of 98.6% and 99.6%, for ESO-1 and UTO-1p2  
269 respectively.

270

271 **Fig. 6. Read 1 Alignment Scores. (a) Alignment Score Examples.** A value of 1 is assigned to every perfectly  
272 matched base. A maximum value of 19 was possible for ESO-1 (one base was omitted from analysis because the  
273 preceding sequence ended in the same base). A maximum value of 14 was possible for the PCR-prepared UTO-1p2  
274 control sequence. Distribution of scores reflects final length of the correctly synthesized oligos accounting for  
275 multiple base incorporation, as displayed in (b) for ESO-1 and (c) for the UTO-1 control. 55.4% of sequences had a  
276 maximum value of 19 for ESO-1, and 95.2% of sequences had the maximum value of 14 for the UTO-1 control.

277

#### 278 **Discussion:**

279 Since the isolation of the first DNA polymerase, *E. coli* pol I, by Kornberg in 1956, hundreds of other polymerases  
280 have been discovered, characterized, and engineered, and these polymerases have revolutionized the biomedical  
281 sciences with applications such as PCR and DNA sequencing. Herein, we have extended the capabilities of these  
282 enzymes and harnessed the same molecular machinery that made sequencing-by-synthesis possible to synthesize  
283 novel single-stranded DNA sequences. Enzymatic methods of DNA sequencing quickly overtook the Maxam-  
284 Gilbert chemical method more than 40 years ago; they were faster, less expensive, and able to produce longer reads.  
285 We hypothesize that DNA synthesis methods will follow a similar path with enzymatic methods opening the door  
286 for the production of longer, more accurate sequences at lower cost and without the production of hazardous waste.

287

288 We synthesized a 20 base single-stranded DNA oligo with stepwise yields between 98-99% using a DNA  
289 polymerase, reversible terminators, and a universal templating oligonucleotide. Our methods are already competitive  
290 with chemical methods, though further optimization will be required for the efficient synthesis of long oligos. For  
291 example, decreased enzymatic fidelity and mismatch discrimination would decrease reaction times and the length of  
292 the UTO required, and highly pure reversible terminators and a neutralization step following cleavage could  
293 eliminate multiple incorporation events. Additionally, we envision that the yield of full-length products without  
294 single-base deletions could be further increased by adding a capping step to terminate synthesis of unextended  
295 oligos after every step, and full-length products can be selected for by adding a final base either modified with a

296 group that can be easily pulled-down such as biotin, or with one that may protect against exonucleolytic degradation  
297 in a cleanup step. It is reasonable to suspect that EOS can be improved to produce results greater than what is  
298 currently seen with chemical methods. High efficiency and low cost should encourage the use of this technology,  
299 leading to further advances.

300

#### 301 **Methods:**

302 **Primer extension assays on double-stranded DNA.** Primers were hybridized to a biotinylated target sequence  
303 immobilized on streptavidin-coated magnetic beads (Dynabeads MyOne Streptavidin T1, Thermo Fisher, Waltham,  
304 MA) by heating to 70°C for five minutes then 55°C for 15 minutes then 25°C for five minutes in RB (1M sodium  
305 chloride, 25mM Tris-HCl pH 7.5, 0.01% TWEEN20). 0.1mg of beads were used per 25µL reaction. Reactions were  
306 started by the addition of nucleotide at temperature and stopped by the addition of a 1.6x volume of RB. The  
307 hybridized primer was stripped from the bead-bound template using 0.1N sodium hydroxide for ten minutes at room  
308 temperature and analyzed by denaturing PAGE. All oligos were purchased from Integrated DNA Technologies  
309 (IDT, Redwood City, CA). Sequences are listed in Supp. Table 1.

310

#### 311 **Preparation of single-stranded DNA on a solid surface for extension.**

312 Single-stranded oligos were immobilized to streptavidin coated beads. 0.1mg of beads were used per 25µL reaction  
313 volume. Reactions were started by the addition of nucleotide at temperature and stopped by the addition of a 1.6x  
314 volume of RB. The immobilized primer was stripped from the bead-bound template in 0.1N sodium hydroxide for  
315 five minutes at 65°C and analyzed by denaturing PAGE. Oligos were purchased from IDT and are listed in Supp.  
316 Table 1.

317

#### 318 **Primer extension reactions with Duplase enzymes.**

319 For reactions on double-stranded DNA, magnetic beads were prepared as previously described with immobilized  
320 template and hybridized primer. Beads were washed in reaction buffer and then resuspended in the reaction mix  
321 containing a final concentration of 20mM Tris-HCl pH8.8, 10mM ammonium sulfate, 10mM KCl, 0.1% Triton X-  
322 100, 2mM MgSO<sub>4</sub>, 1mg/mL bovine serum albumin (Sigma-Aldrich, St. Louis, MO), 4µg/mL polyvinylpyrrolidone  
323 10, and 1ug of enzyme. Reaction mixtures were pre-warmed to 45°C, and nucleotide was added to a final

324 concentration of 2 $\mu$ M. Reactions were allowed to proceed for one minute before stopping for analysis by denaturing  
325 PAGE. Extension reactions on single-stranded DNA were performed as previously described though buffer  
326 components, reaction times and temperatures, and nucleotide concentrations varied across experiments conducted  
327 for research purposes. Optimized conditions for the synthesis of the 20 base ESO-1 sequence are described below.

328

329 **Extension reactions with commercially available enzymes.**

330 Extension reactions on single-stranded DNA were performed similarly to the reactions with Duplase enzymes  
331 described above for 60 minutes at 60°C using 2U Vent (NEB, Ipswich, MA), 2U Deep Vent (NEB), or 2U  
332 Terminator (NEB) in 20mM Tris-HCl pH8.8, 10mM ammonium sulfate, 10mM KCl, 0.1% Triton X-100, 8mM  
333 manganese chloride, 10uM dGTP. Extension reactions with 2U Phusion (NEB) were performed for 60 minutes at  
334 60°C using Phusion high fidelity buffer, 8mM manganese chloride, 10uM dGTP. Extension reactions with 10U  
335 Phi29 (NEB) were performed for 60 minutes at 37°C using Phi29 buffer, 8mM manganese chloride, 10uM dGTP.  
336 Extension reactions with 5U Klenow (NEB) or 3U T4 DNA polymerase (NEB) were performed for 60 minutes at  
337 37°C using NEBuffer 2, 8mM manganese chloride, 10uM dGTP. Extension reactions with 250U Superscript III  
338 (Thermo Fisher) were performed for 5 minutes at 25°C, 5 minutes at 50°C, then 30 minutes at 55°C using first  
339 strand buffer, 8mM manganese chloride, 10uM dGTP. Reactions were analyzed by denaturing PAGE.

340

341 **Cleavage of Reversible Terminators:** After incorporation of reversible terminators, beads were resuspended in  
342 50mM TCEP pH9.0 (Gold Bio, Olivette, MO) and incubated at 60°C for 10 minutes. The TCEP solution was  
343 removed, and beads were resuspended in RB and transferred to a new reaction vessel.

344

345 **Synthesis of the 20 base ESO-1 sequence with SPO-13.**

346 Beads were prepared as previously described with immobilized SPO-13. 0.2mg of beads were used in 50 $\mu$ L  
347 reactions containing 200mM NaCl, 20mM Tris pH 8.0, 8mM MnCl<sub>2</sub>, 1 $\mu$ g Duplase-3, and 100 $\mu$ M of a 3'-O-  
348 azidomethyl-dNTP. Reactions were allowed to proceed for one hour before stopping. The sequence ESO-1 was  
349 synthesized by the incorporation of 3'-O-azidomethyl-dCTP followed by cleavage with TCEP and the incorporation  
350 of 3'-O-azidomethyl-dGTP, followed by cleavage with TCEP, etc. For the first synthesis, after the addition of 4, 8,  
351 12, 16, and 20 bases, 0.025mg of beads was removed from solution, and the oligo was stripped from beads and

352 analyzed by denaturing PAGE. Volumes for next steps were adjusted accordingly. After the final  
353 incorporation/cleavage step, the oligo with ESO-1 sequence was used for sequencing.

354

355 **Fluorescent labeling of oligos with terminal deoxynucleotidyl transferase (TdT).**

356 Labeling of poly-T sequences, which do not stain well with SYBR Gold, was accomplished by end-labeling oligos  
357 with TdT (New England Biolabs, Ipswich, MA) and fluorescein-12-ddUTP (Perkin Elmer, San Jose, CA) by  
358 incubating 0.1mg of beads with 5 $\mu$ M nucleotide and 20U of enzyme in 20mM Tris-HCl pH7.5, 10mM ammonium  
359 sulfate, 10mM KCl, 0.1% Triton X-100, and 0.5mM MnCl<sub>2</sub>. Reactions were allowed to proceed for 3 hours at 37°C  
360 before heat-inactivation of the enzyme for 20 minutes at 75°C.

361

362 **Sequencing of SPO-13 with synthesized 20 base AM1 sequence.**

363 The SPO-13-AM1 oligo still on beads was poly adenylated using TdT (Roche, Santa Clara, CA) and Duplase-1.  
364 Illumina sequencing adapters were added to these sequences using PCR, a poly (T)-tailed P7 adapter sequence, P7-  
365 Poly (T), and an oligo with the sequence PCR-ESO1-FPCR was repeated with Illumina P5 and P7 adapter oligos,  
366 and the library quality was analyzed by Bioanalyzer (Agilent, Santa Clara) and qPCR. All oligos were purchased  
367 from IDT. A MiSeq nano flow cell (Illumina) was clustered with a 4pM library comprised of 90% PhiX and 10%  
368 PCR-prepared library. 150 step paired end cycling was run using a V2 kit (Illumina), and the AM1 sequence was  
369 identified by manually sorting first output reads. Background noise was filtered by selecting for part of the universal  
370 templating oligonucleotide sequence, UTO-1p (Supp. Table 1)

371

372 **Denaturing PAGE.** Samples were resolved by electrophoresis in 6% or 15% polyacrylamide TBE-Urea gels  
373 (Thermo Fisher) in TBE. Gels were stained in SYBR Gold (Thermo Fisher) for five to ten minutes at room  
374 temperature and imaged on a ChemiDoc MP system (Bio-Rad, Hercules, CA). Fluorescent products were visualized  
375 before and after staining.

376

377 **Acknowledgements:**

378 We would like to thank Justin Costa and Janet Warrington for their help and expertise writing. We would also like to  
379 thank Foster Hoff for his help in designing UTO-1 and Jiayi Sun for her help in analyzing sequencing data.

380

381 **Competing interest statement:**

382 All authors are employees of and shareholders at Centrillion Biosciences. This research has been patented and may  
383 be commercialized in the future.

384

385 **References:**

- 386 1. Michelson AM, Todd AR. Nucleotides part XXXII. Synthesis of a dithymidine dinucleotide containing a 3':  
387 5'-internucleotidic linkage. *J Chem Soc Resumed*. 1955 Jan 1;0(0):2632–8.
- 388 2. Agarwal KL, Büchi H, Caruthers MH, Gupta N, Khorana HG, Kleppe K, et al. Total synthesis of the gene for  
389 an alanine transfer ribonucleic acid from yeast. *Nature*. 1970 Jul;227(5253):27–34.
- 390 3. Goodchild J. Therapeutic oligonucleotides. In: *Therapeutic Oligonucleotides*. Springer; 2011. p. 1–15.
- 391 4. Dowdy SF. Overcoming cellular barriers for RNA therapeutics. *Nat Biotechnol*. 2017;35(3):222.
- 392 5. Pastinen T, Raitio M, Lindroos K, Tainola P, Peltonen L, Syvänen A-C. A system for specific, high-  
393 throughput genotyping by allele-specific primer extension on microarrays. *Genome Res*. 2000;10(7):1031–42.
- 394 6. Kosuri S, Church GM. Large-scale de novo DNA synthesis: technologies and applications. *Nat Methods*.  
395 2014;11(5):499–507.
- 396 7. Organick L, Ang SD, Chen Y-J, Lopez R, Yekhanin S, Makarychev K, et al. Random access in large-scale  
397 DNA data storage. *Nat Biotechnol*. 2018;36(3):242.
- 398 8. Uchida T, Funayama-Machida C. Systematic Synthesis of Dinucleotides and Trinucleotides with RNases U2  
399 N1 and a Non-Specific RNase from *B. subtilis*. *J Biochem (Tokyo)*. 1977;81(5):1237–46.
- 400 9. GILLAM S, ROTTMAN F, JAHNKE P, SMITH M. Enzymatic synthesis of oligonucleotides of defined  
401 sequence: Synthesis of a segment of yeast iso-i-cytochrome c gene. 1977;5.
- 402 10. Smith M. Synthetic DNA and biology (Nobel lecture). *Angew Chem Int Ed Engl*. 1994;33(12):1214–21.
- 403 11. Schmitz C, Reetz MT. Solid-Phase Enzymatic Synthesis of Oligonucleotides. *Org Lett*. 1999 Dec  
404 1;1(11):1729–31.
- 405 12. Motea EA, Berdis AJ. Terminal deoxynucleotidyl transferase: the story of a misguided DNA polymerase.  
406 *Biochim Biophys Acta BBA-Proteins Proteomics*. 2010;1804(5):1151–66.
- 407 13. Minhaz Ud-Dean SM. A theoretical model for template-free synthesis of long DNA sequence. *Syst Synth  
408 Biol*. 2008 Dec;2(3–4):67–73.
- 409 14. Mathews AS, Yang H, Montemagno C. 3'-O-Caged 2'-Deoxynucleoside Triphosphates for Light-Mediated,  
410 Enzyme-Catalyzed, Template-Independent DNA Synthesis. *Curr Protoc Nucleic Acid Chem*.  
411 2017;71(1):13.17. 1-13.17. 38.
- 412 15. Mathews AS, Yang H, Montemagno C. Photo-cleavable nucleotides for primer free enzyme mediated DNA  
413 synthesis. *Org Biomol Chem*. 2016;14(35):8278–88.

- 414 16. Palluk S, Arlow DH, de Rond T, Barthel S, Kang JS, Bector R, et al. De novo DNA synthesis using  
415 polymerase-nucleotide conjugates. *Nat Biotechnol.* 2018;
- 416 17. Jensen MA, Davis RW. Template-Independent Enzymatic Oligonucleotide Synthesis (TiEOS): Its History,  
417 Prospects, and Challenges. *Biochemistry.* 2018;57(12):1821–32.
- 418 18. Lee HH, Kalhor R, Goela N, Bolot J, Church GM. Enzymatic DNA synthesis for digital information storage.  
419 *bioRxiv.* 2018;348987.
- 420 19. Blanco L, Bernad A, Lázaro JM, Martín G, Garmendia C, Salas M. Highly efficient DNA synthesis by the  
421 phage phi 29 DNA polymerase. Symmetrical mode of DNA replication. *J Biol Chem.* 1989;264(15):8935–40.
- 422 20. Palla M, Guo W, Shi S, Li Z, Wu J, Jockusch S, et al. DNA sequencing by synthesis using 3'-O-azidomethyl  
423 nucleotide reversible terminators and surface-enhanced Raman spectroscopic detection. *RSC Adv.*  
424 2014;4(90):49342–6.
- 425 21. Hutter D, Kim M-J, Karalkar N, Leal NA, Chen F, Guggenheim E, et al. Labeled nucleoside triphosphates  
426 with reversibly terminating aminoalkoxyl groups. *Nucleosides Nucleotides Nucleic Acids.* 2010;29(11–  
427 12):879–95.
- 428 22. Zhou W, McGall G, Moti J, Mei R. Reversible terminator molecules and methods of their use. *Google*  
429 *Patents;* 2017.
- 430 23. Litosh VA, Wu W, Stupi BP, Wang J, Morris SE, Hersh MN, et al. Improved nucleotide selectivity and  
431 termination of 3'-OH unblocked reversible terminators by molecular tuning of 2-nitrobenzyl alkylated  
432 HOMedU triphosphates. *Nucleic Acids Res.* 2011;39(6):e39–e39.
- 433 24. Metzker ML, Raghavachari R, Richards S, Jacutin SE, Civitello A, Burgess K, et al. Termination of DNA  
434 synthesis by novel 3'-modifieddeoxyribonucleoside 5'-triphosphates. *Nucleic Acids Res.* 1994;22(20):4259–  
435 67.
- 436 25. Smith GP, Rigatti R, Ost TWB, Balasubramanian S, Sanches-Kuiper RM. Polymerases. *Google Patents;* 2015.
- 437 26. Smith GP, Bailey DMD, Sanches RM, Swerdlow H, Earnshaw DJ. Modified polymerases for improved  
438 incorporation of nucleotide analogues. *Google Patents;* 2013.
- 439 27. Chen F, Dong M, Ge M, Zhu L, Ren L, Liu G, et al. The History and Advances of Reversible Terminators  
440 Used in New Generations of Sequencing Technology. *Genomics Proteomics Bioinformatics.* 2013  
441 Feb;11(1):34–40.
- 442 28. Ju J, Kim DH, Bi L, Meng Q, Bai X, Li Z, et al. Four-color DNA sequencing by synthesis using cleavable  
443 fluorescent nucleotide reversible terminators. *Proc Natl Acad Sci.* 2006;103(52):19635–40.
- 444 29. Dunn MR, Larsen AC, Fahmi N, Zahurancik WJ, Meyers M, Suo Z, et al. Terminator-mediated synthesis of  
445 unbiased TNA polymers requires 7-deazaguanine to suppress GG mispairing during TNA transcription. *J Am*  
446 *Chem Soc.* 2015;137:4014–7.
- 447 30. Renders M, Emmerechts G, Rozenski J, Krecmerová M, Holý A, Herdewijn P. Enzymatic synthesis of  
448 phosphonomethyl oligonucleotides by terminator polymerase. *Angew Chem.* 2007;119(14):2553–6.
- 449 31. Zamft BM, Marblestone AH, Kording K, Schmidt D, Martin-Alarcon D, Tyo K, et al. Measuring cation  
450 dependent DNA polymerase fidelity landscapes by deep sequencing. *PloS One.* 2012;7(8):e43876.
- 451 32. Innis MA, Gelfand DH, Sninsky JJ, White TJ. PCR protocols: a guide to methods and applications. *Academic*  
452 *press;* 2012.



- 453 33. Dean FB, Hosono S, Fang L, Wu X, Faruqi AF, Bray-Ward P, et al. Comprehensive human genome  
454 amplification using multiple displacement amplification. *Proc Natl Acad Sci.* 2002;99(8):5261–6.
- 455 34. Nelson JR, Cai YC, Giesler TL, Farchaus JW, Sundaram ST, Ortiz-Rivera M, et al. TempliPhi, phi29 DNA  
456 polymerase based rolling circle amplification of templates for DNA sequencing. *Biotechniques.*  
457 2002;32(6):S44.
- 458 35. Loakes D. Survey and summary: The applications of universal DNA base analogues. *Nucleic Acids Res.*  
459 2001;29(12):2437–47.
- 460 36. Loakes D, Brown DM, Linde S, Hill F. 3-Nitropyrrole and 5-nitroindole as universal bases in primers for  
461 DNA sequencing and PCR. *Nucleic Acids Res.* 1995;23(13):2361–6.
- 462 37. Vallone PM, Benight AS. Melting studies of short DNA hairpins containing the universal base 5-nitroindole.  
463 *Nucleic Acids Res.* 1999;27(17):3589–96.
- 464 38. Loakes D, Hill F, Brown DM, Salisbury SA. Stability and structure of DNA oligonucleotides containing non-  
465 specific base analogues. *J Mol Biol.* 1997;270(3):426–35.
- 466 39. Howell WM, Grundberg I, Faryna M, Landegren U, Nilsson M. Glycosylases and AP-cleaving enzymes as a  
467 general tool for probe-directed cleavage of ssDNA targets. *Nucleic Acids Res.* 2010;38(7):e99–e99.
- 468

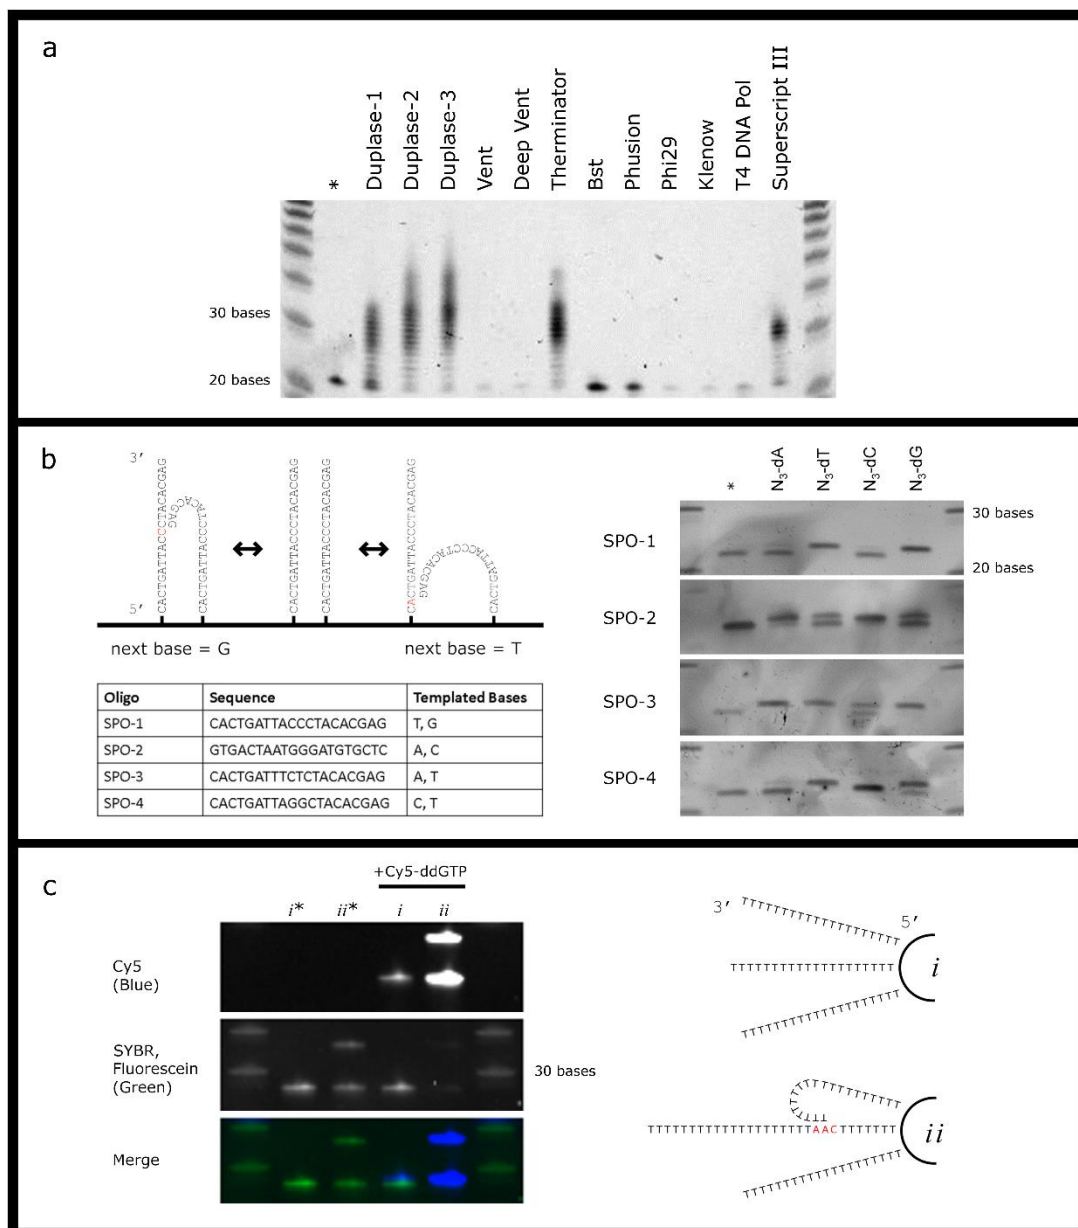

**Fig. 1.**

**Dynamic hybridization of DNA enables EOS.** (a) **Extension of single-stranded DNA by DNA polymerases and reverse transcriptases.** Denaturing PAGE analysis of a 20 base single-stranded sequence, self-priming oligo-1 aka SPO-1, using different enzymes and dGTP. Despite a maximum of two bases of hybridization, some enzymes are able to extend this solid-phase oligonucleotide. None of these enzymes have previously been reported to have nucleotidyl transferase activity on single-stranded DNA. (b) **Sequence-specific extension of single-stranded DNA.** Duplase extension of four different 20 base oligos proceeds in a sequence-specific manner, and only two bases of hybridization are required for extension. \* indicates unextended control. Extension with non-templated bases can be explained by misincorporation that occurs at long reaction times. (c) **Extension of solid-phase oligos through intermolecular reactions.** Magnetic beads were conjugated with either a 20 base poly-T oligo as illustrated in *i*, or with that oligo plus a 30 base poly-T oligo with an internal 5'-CAA-3' sequence as illustrated in *ii*. Beads were extended using Duplase-3 and Cy5-ddGTP (\* indicates unextended control during this step), after which, all samples were labeled with TdT and fluorescein-12-ddUTP. Oligos appear blue if extended with Duplase-3 and green if extended with TdT.

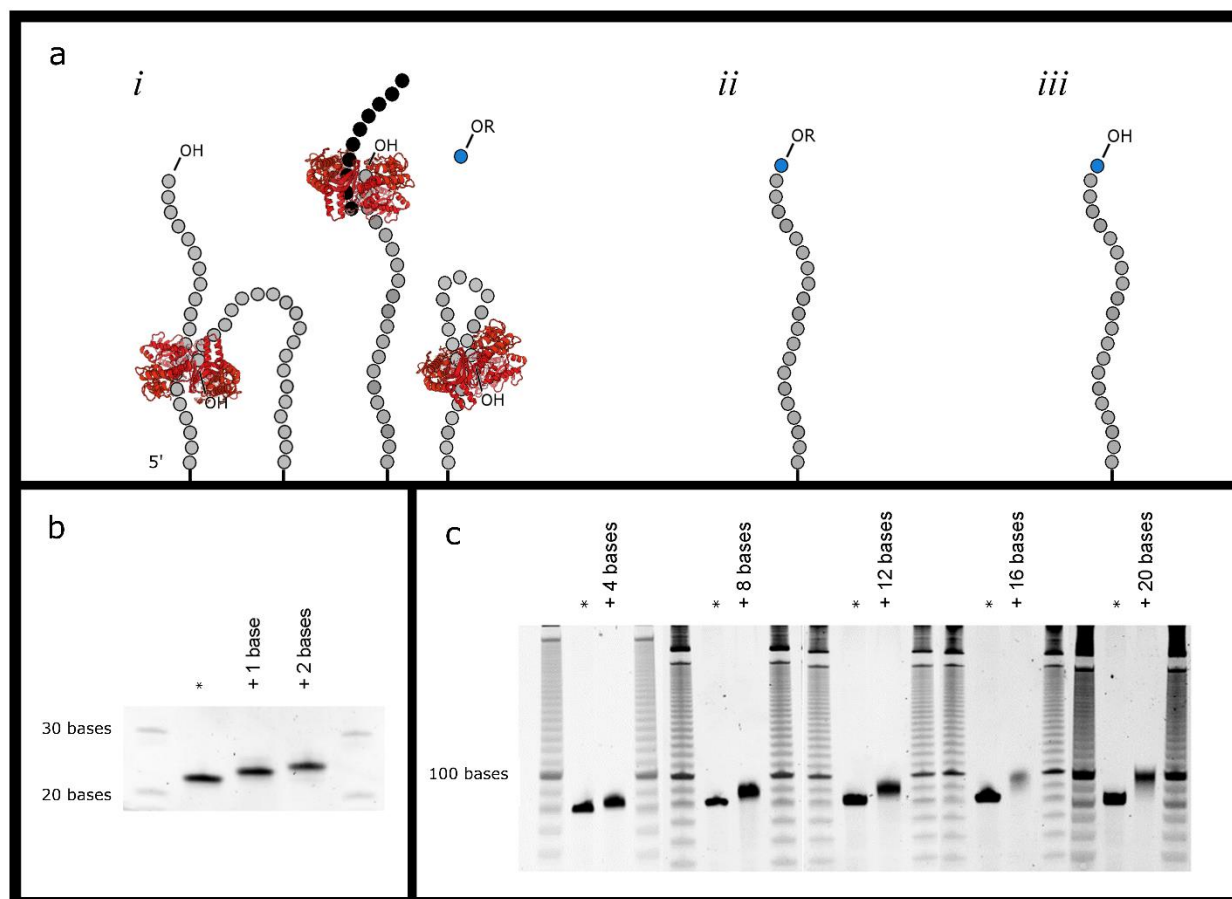

**Fig. 2. (a) Polymerase-mediated solid-phase oligonucleotide synthesis using chemically blocked substrates.** DNA/RNA polymerases and RTs require a template for extension. (i) The templating strand for a surface-bound oligonucleotide may be a neighboring strand, an oligo in solution, or the nascent strand itself. A 3'-reversibly blocked nucleotide is added by the enzyme in solution to produce the oligo depicted in (ii), one base longer, but not capable of being extended. The 3'-OR group is then converted into a 3'-OH group through a cleavage step producing the oligo in (iii), which can be extended again. **(b) Sequential incorporation of two bases.** Denaturing PAGE analysis of a 20 base template, SPO-1, (after incorporation of 3'-O-azidomethyl-dTTP (+1 base), followed by cleavage of the 3'-O-azidomethyl capping group and incorporation of 3'-O-azidomethyl-dCTP (+2 bases). \* indicates unextended control. **(c) Synthesis of a 20 base single-stranded DNA fragment on a universal templating oligo.** A 20 base sequence, ESO-1, was synthesized using this method on a universal templating oligo (UTO-1) using Duplase-3. Denaturing PAGE was performed after the addition of 4, 8, 12, 16, and 20 bases.

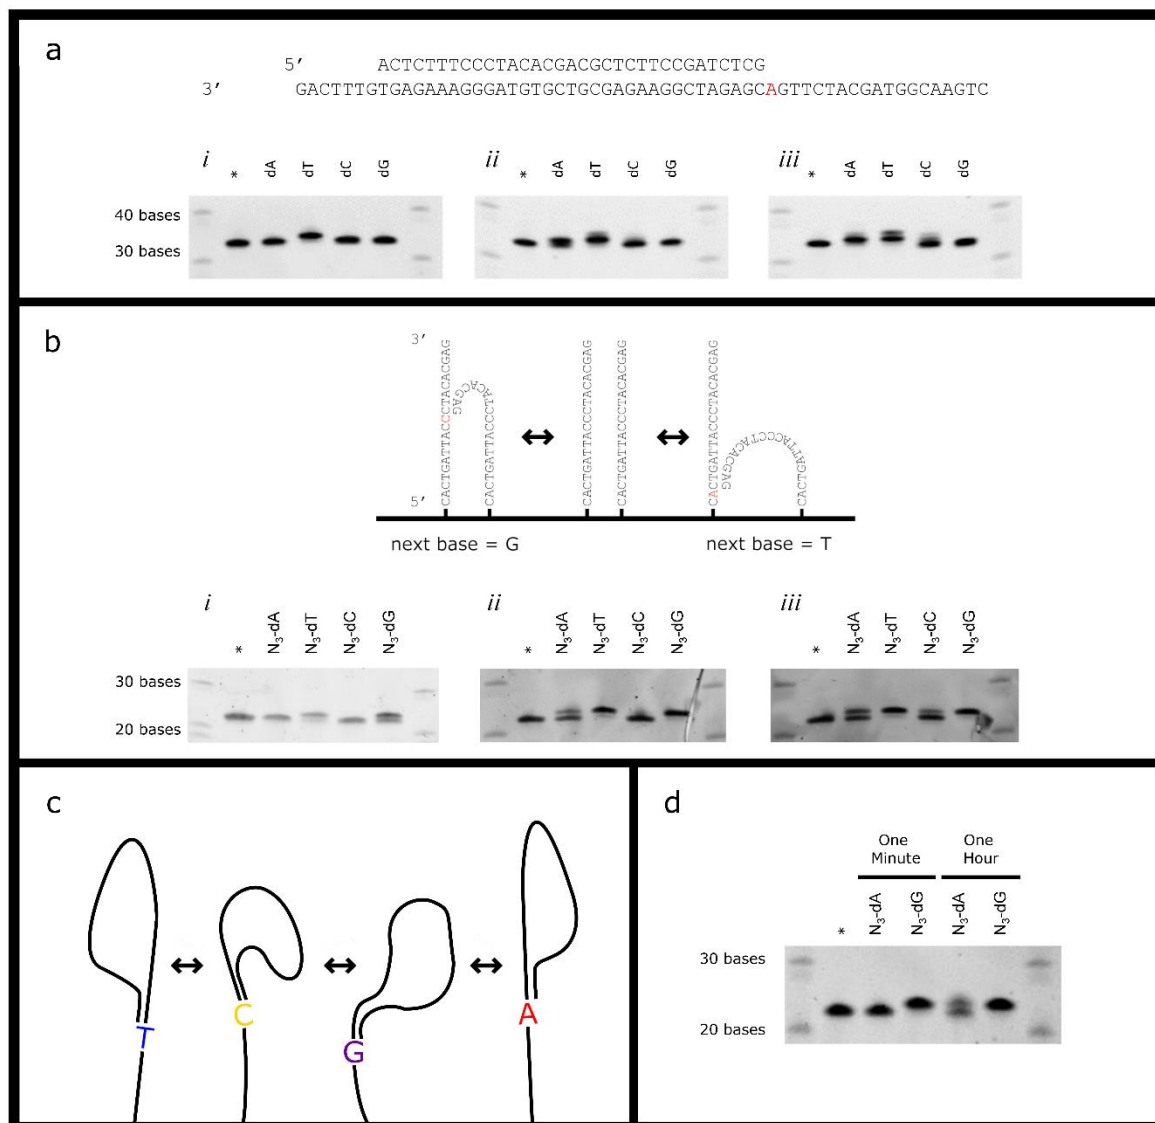

**Fig.3. Effects of misincorporation on step-wise yield. (a) Duplase fidelity on a double-stranded substrate.**

Primer extension reactions were conducted using the two oligos sequences shown with the longer templating strand bound to streptavidin-coated magnetic beads through a 5' biotin modification. The primer was stripped from the surface-bound template and analyzed by denaturing PAGE. Extension opposite adenine is shown with dATP, dTTP, dCTP, or dGTP used as the substrate in the reaction for (i) Duplase-1, (ii) Duplase-2, and (iii) Duplase-3. Increasing misincorporation can be seen. \* indicates unextended primer control. **(b) Extension of a single-stranded substrate.** Reactions were conducted using a surface-bound single-stranded oligo, SPO-1, as shown with one of four 3'-O-azidomethyl-dNTP in solution and (i) Duplase-1, (ii) Duplase-2, and (iii) Duplase-3. \* indicates unextended primer control. As polymerase fidelity decreases, the capability to incorporate bases not templated by a neighboring strand or hairpin structure increases. **(c) Illustration of transient hybridization.** An example oligonucleotide is shown templating four different bases for four different hybridization positions. Such an oligonucleotide at any point in time may exist in one of these conformations but not all of these conformations. **(d) Misincorporation reactions may be slower than templated reactions.** Extension of the single-stranded substrate in (b), SPO-1, is demonstrated in one minute or one hour with Duplase-3 and 3'-O-azidomethyl-dATP (not templated by this oligonucleotide) or 3'-O-azidomethyl-dGTP (templated). In one minute, extension appears to be complete using the templated base, G, but no extension is observed using the non-templated base, A. If the reaction is allowed to proceed for one hour, however, extension can be observed using A.

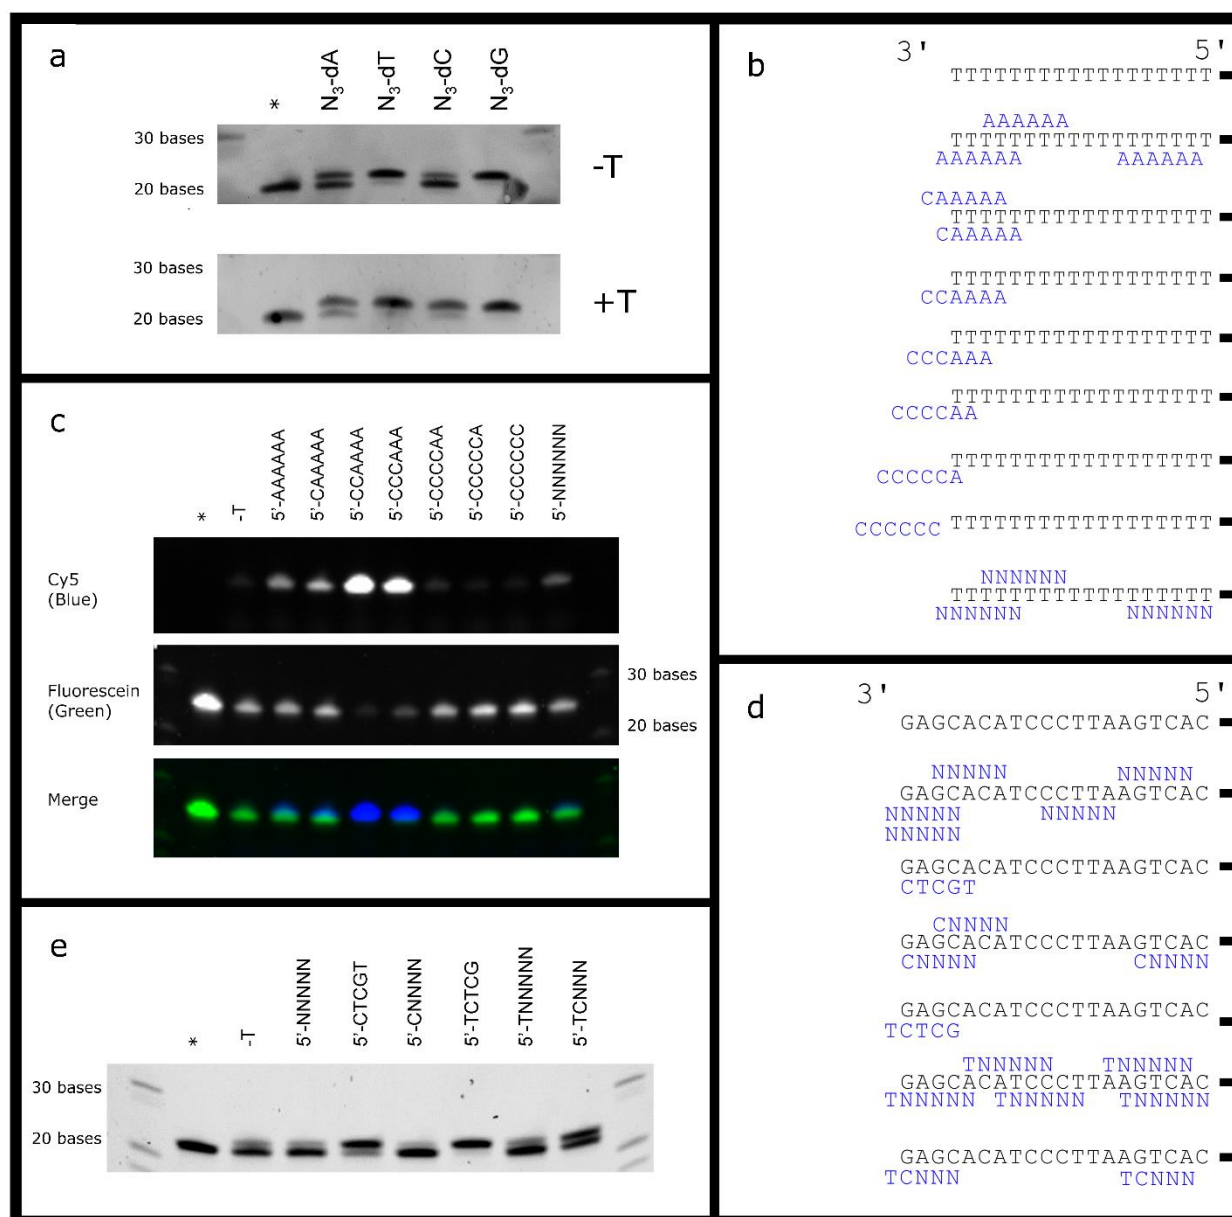

**Fig. 4. (a) Extension of a short solid-phase oligo is enhanced by the addition of randomers to the reaction solution.** Denaturing PAGE analysis of a 20 base oligo extended with Duplase-3 and 3'-O-azidomethyl-dNTPs without added template to solution (-T) or with the addition of 3'-phosphate blocked random hexamers to the reaction solution (+T). \* indicates unreacted control. **(b) Possible hybridization of different templates to a solid-phase poly-T sequence.** Templates used in (c) are drawn in blue. **(c) Three bases of hybridization are required with a template in solution.** Denaturing PAGE analysis of a poly-T sequence extended with Duplase-3 and Cy5-ddGTP. 3'-phosphate blocked hexamers are used in reaction solutions with the sequences listed. \* indicates unreacted control. -T indicates reactions without added template. After extension with Duplase-3, all samples were incubated with TdT and fluorescein-12-ddUTP to label any primer that was not extended with Duplase-3. **(d) Possible hybridization of different templates to a solid-phase oligo.** Templates used in (e) are drawn in blue. Some potential sequence alignments during transient hybridization reactions are illustrated. **(e) Extension of a solid-phase oligo with specific, random, and semi-random templates in solution.** Denaturing PAGE analysis of SPO-1 after extension with Duplase-3 and 3'-O-azidomethyl-dATP. 3'-phosphate blocked pentamers are used in reaction solutions with the sequences listed. \* indicates unreacted control. -T indicates reactions without added template.

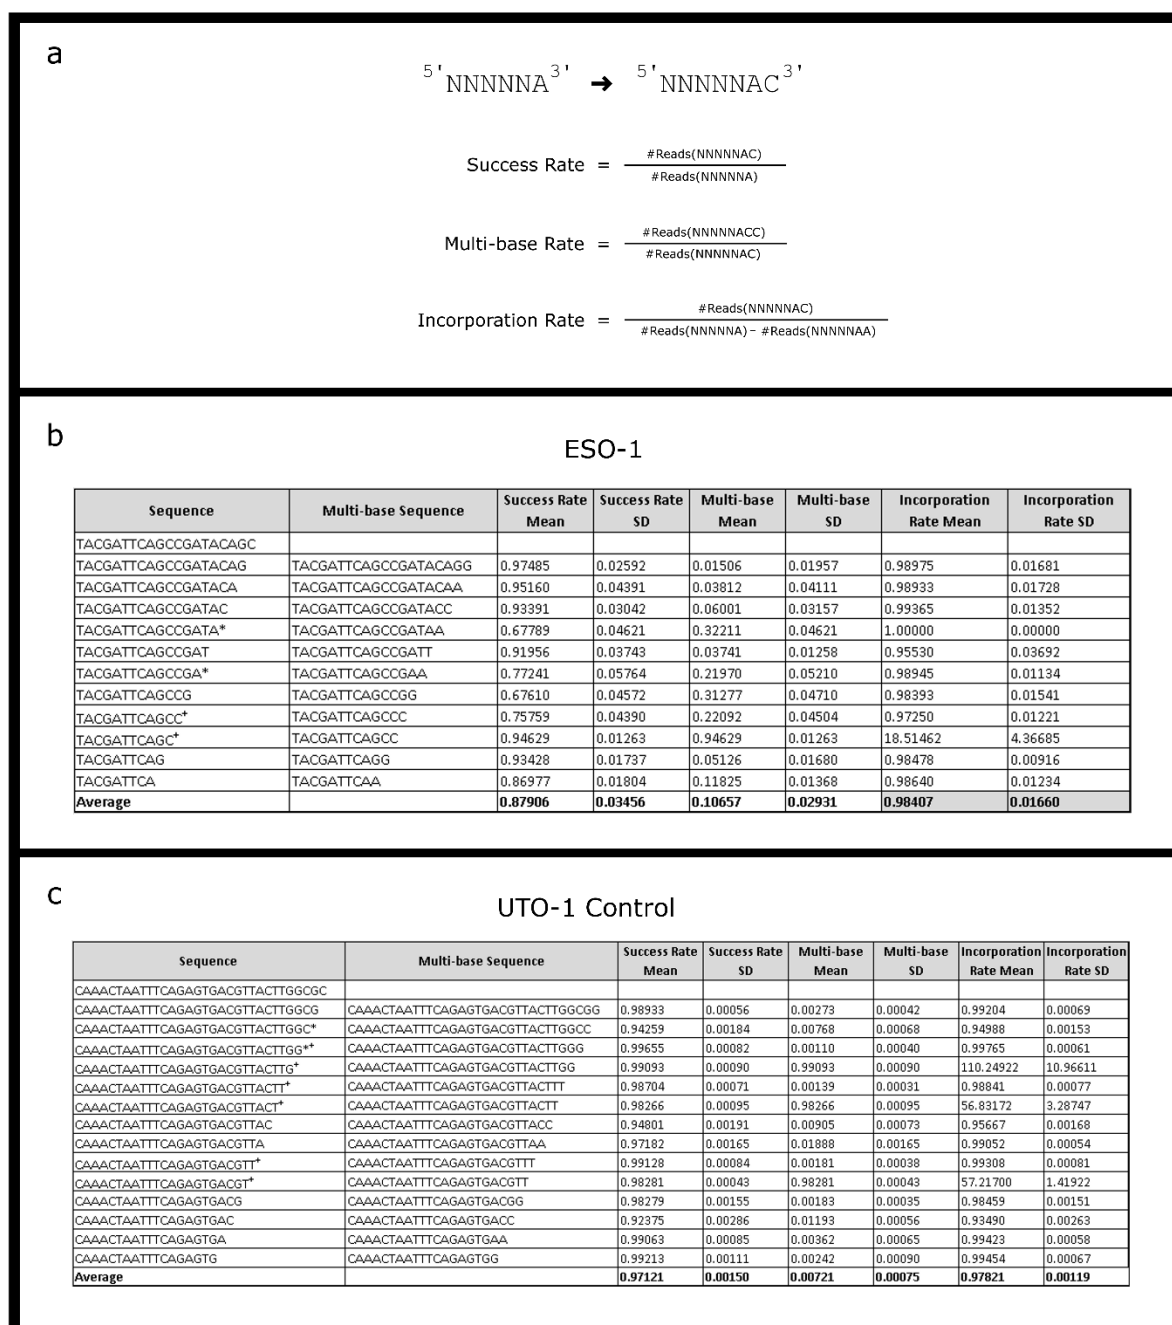

**Fig. 5. Oligo Synthesis Efficiency.** (a) Variables for evaluating efficiency. The success rate, multiple base incorporation rate, and adjusted incorporation rate are calculated for the extension of the oligo NNNNNA with D. These numbers are calculated for the bootstrapped sequences for ESO-1 (b), and for the partial UTO-1 sequence used as a control (c). \* indicates oligos for which the n+2 base is the same so that the sequence NNNNNAA as in the example in part (a) may be due to multi-base extension or C not being incorporated. + indicates oligos for which the n+1 base is the same so that multi-base extension cannot be distinguished from accurate synthesis. These numbers were omitted from analysis.

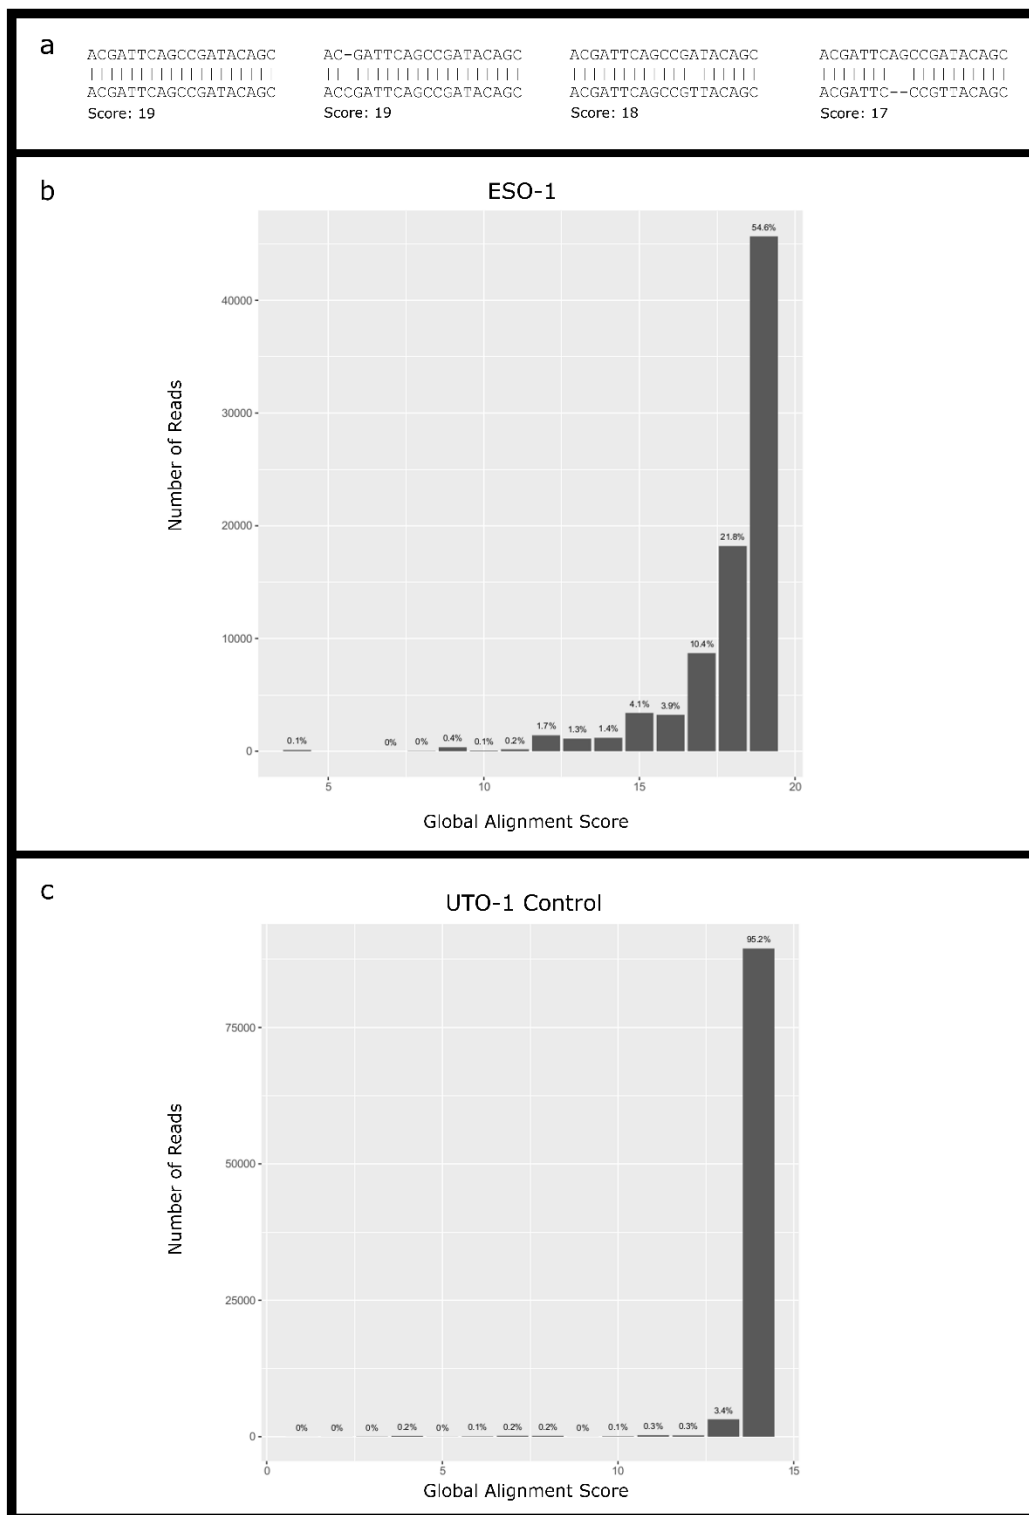

**Fig. 6. Read 1 Alignment Scores. (a) Alignment Score Examples.** A value of 1 is assigned to every perfectly matched base. A maximum value of 19 was possible for ESO-1 (one base was omitted from analysis because the preceding sequence ended in the same base). A maximum value of 14 was possible for the PCR-prepared UTO-1p2 control sequence. Distribution of scores reflects final length of the correctly synthesized oligos accounting for multiple base incorporation, as displayed in (b) for ESO-1 and (c) for the UTO-1 control. 55.4% of sequences had a maximum value of 19 for ESO-1, and 95.2% of sequences had the maximum value of 14 for the UTO-1 control.
